# Supplementary material for: SYK-623, a δ Opioid Receptor Inverse Agonist, Mitigates Chronic Stress-Induced Behavioral Abnormalities and Disrupted Neurogenesis
Source: MDPI journal article supplement (doi:10.3390/jcm13020608), 2024-01-21
Supplement: s1 [file s1]

Supplemental Table S1. Treatment groupings

| Cohort 1                                          | Number of mice |                                |
|---------------------------------------------------|----------------|--------------------------------|
|                                                   | Total          | Fixed for immunohistochemistry |
| Treatment                                         |                |                                |
| Non-stress + vehicle (saline)                     | 10             | 5                              |
| ACMS + vehicle                                    | 10             | 5                              |
| ACMS + imipramine                                 | 10             | 5                              |
|                                                   |                |                                |
| Non-stress + vehicle (10% DMSO-containing saline) | 10             | 10                             |
| ACMS + vehicle (10% DMSO-containing saline)       | 10             | 10                             |
| ACMS + SYK-623                                    | 10             | 10                             |
|                                                   |                |                                |
| Non-stress + vehicle (saline)                     | 10             | 10                             |
| ACMS + vehicle                                    | 10             | 10                             |
| ACMS + NTI                                        | 10             | 10                             |

| Cohort 2                                          | Number of mice |                                          |
|---------------------------------------------------|----------------|------------------------------------------|
|                                                   | Total          | Tissue sampling for immunohistochemistry |
| Non-stress + vehicle (10% DMSO-containing saline) | 9              | 9                                        |
| ACMS + vehicle (10% DMSO-containing saline)       | 9              | 9                                        |
| ACMS + SYK-623                                    | 9              | 9                                        |

Animals with following conditions were excluded from each experiment.

**All experiments:** Body weight loss exceeding 15% compared to the start of the experiments.

**Tissue weight and immunohistochemical staining:** Partial loss or damage of tissue during extraction. Residual blood in the brain post-fixation (indicating insufficient fixation).

**Tail suspension test:** Escape by climbing their tail or adhesion tape. Fall due to the peeling of adhesive tape.

**Y-maze:** Total arm entries less than 9 times. Exploration in the same direction.

**Novel arm recognition test (Modified Y-maze):** Total arm entries less than 9 times.

**Novel object recognition test:** Less than 20 seconds of exploration time towards the objects during the training session, or a bias in interest towards the object on one side.

**Open field test:** Total distance of less than 1000 cm.
